# Supplementary material for: Carbon nanotube fibers with enhanced longitudinal carrier mobility for high-performance all-carbon thermoelectric generators
Source: Royal Society of Chemistry journal article supplement (doi:10.1039/c9nr05757a), 2019-01-01
Supplement: c9nr05757a1.pdf [file c9nr05757a1.pdf]

<Supplementary Information>

**Carbon nanotube fibers with enhanced longitudinal carrier  
mobility for high-performance all-carbon thermoelectric  
generators**

*Taemin Lee<sup>a</sup>, Kyung Tae Park<sup>a</sup>, Bon-Cheol Ku<sup>b</sup>, and Heesuk Kim<sup>a,c\*</sup>*

<sup>a</sup>Photo-electronic Hybrids Research Center, Korea Institute of Science and Technology (KIST), Seoul 02792, Korea.

\*E-mail: heesukkim@kist.re.kr

<sup>b</sup>Carbon Composite Materials Research Center, Institute of Advanced Composite Materials, Korea Institute of Science and Technology (KIST), Jeollabuk-do, 55324, Korea.

<sup>c</sup>Division of Energy & Environment Technology, KIST School, Korea University of Science and Technology (UST), Seoul 02792, Korea.

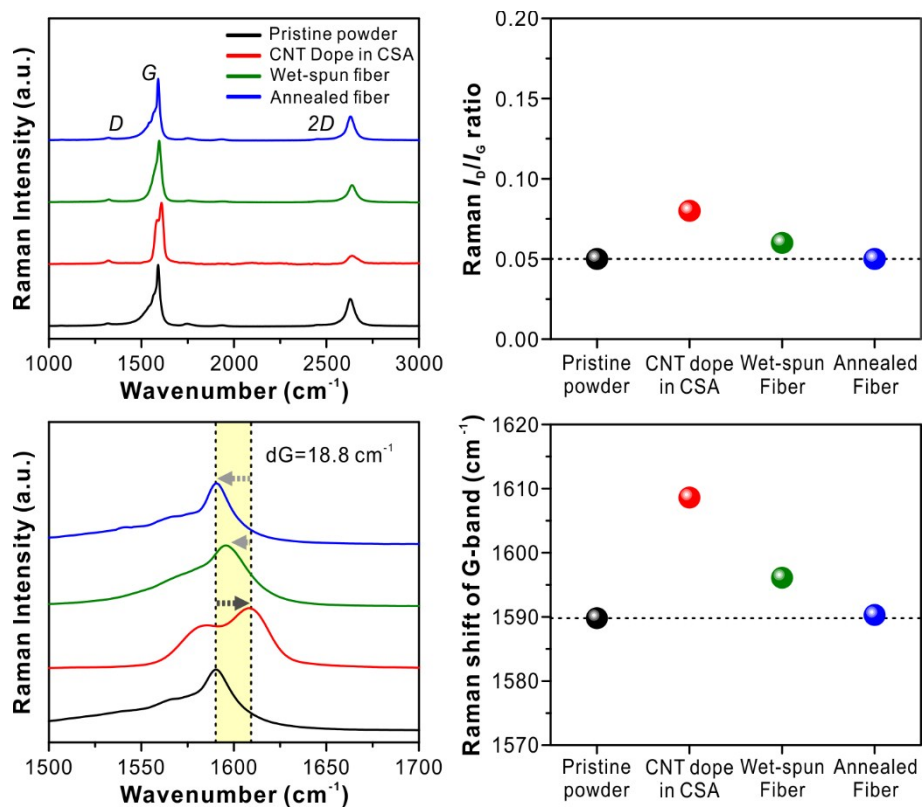

**Fig. S1** Raman spectra ( $\lambda_{\text{ex}}=633$  nm) for pristine CNT powder, CNTs dispersed in CSA, wet-spun CNT fibers, and CNT fibers annealed at 250 °C for 2 h. The Raman spectra are normalized to the intensity of the G-band peak.

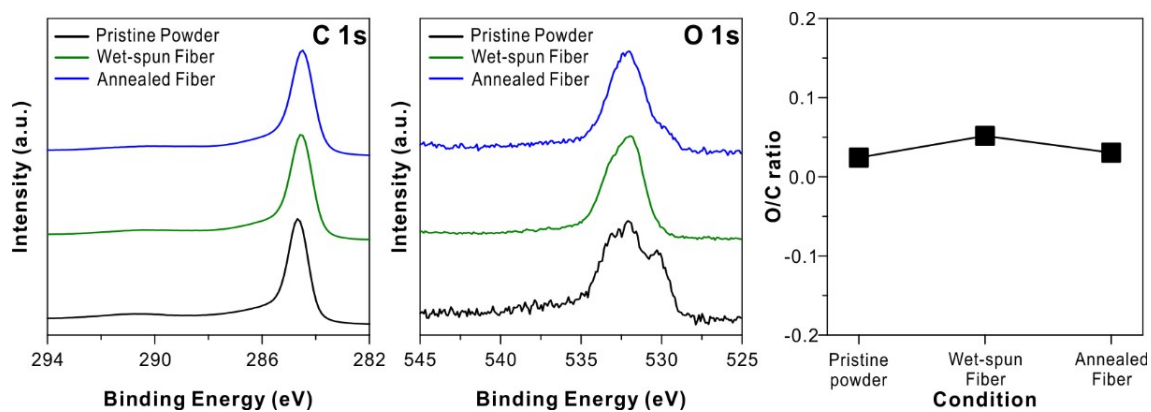

**Fig. S2** XPS high-resolution C(1s) spectra, O(1s) spectra, and relative O/C content ratios of pristine CNT powder, wet-spun CNT fibers, and CNT fibers annealed at 250 °C for 2 h.

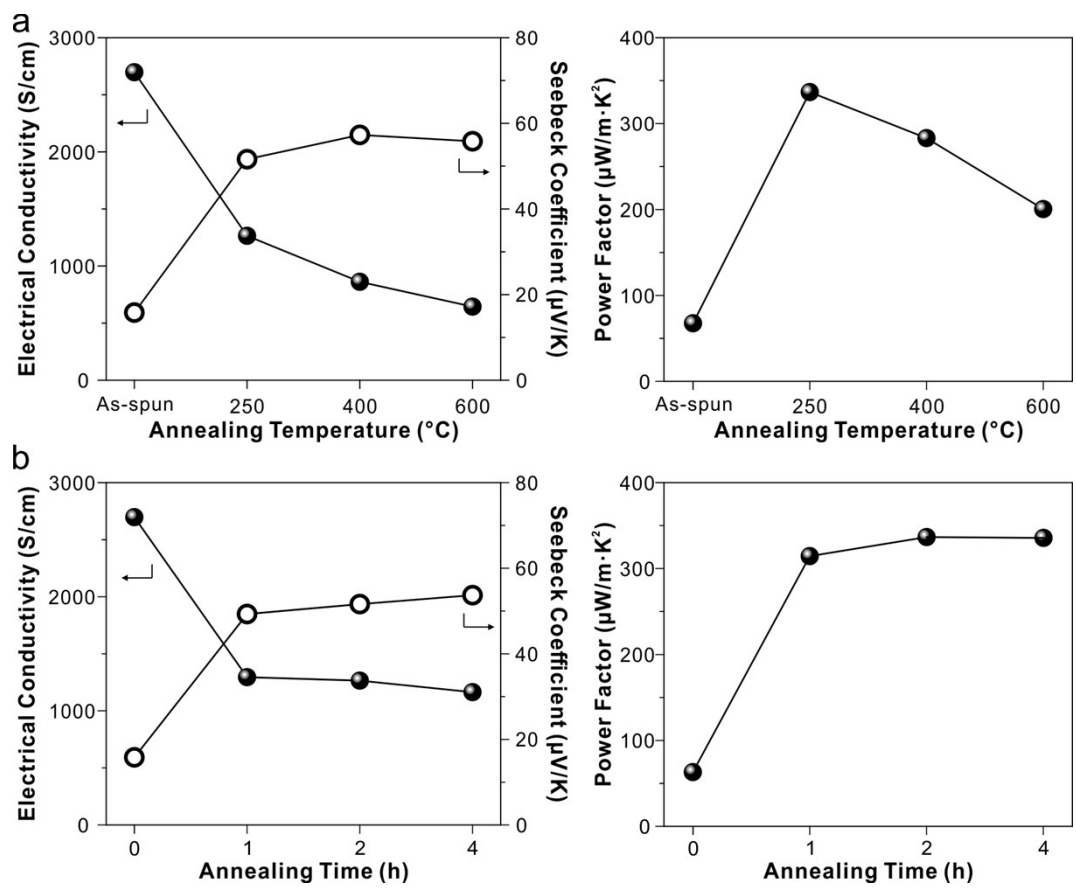

**Fig. S3** TE performances of the as-spun CNT fibers as a function of (a) annealing temperature for 2 h and (b) annealing time at 250 °C. The CNT fibers spun from a 10 mg/mL CNT concentration were used for thermal annealing at various conditions.

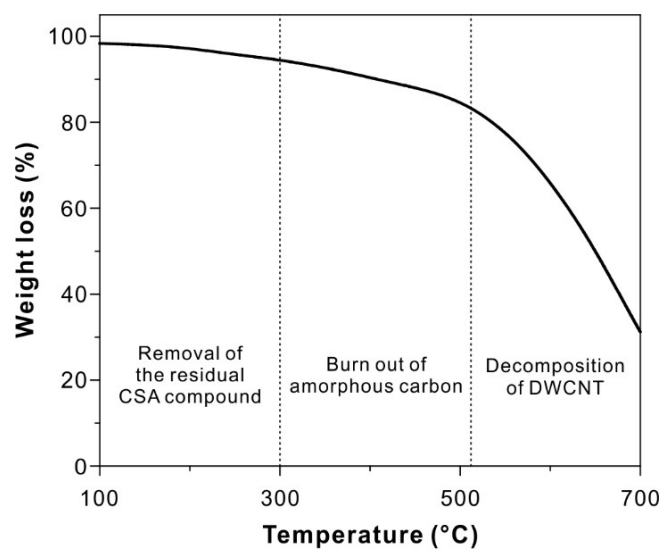

**Fig. S4** Thermogravimetric analysis (TGA) curve of the as-spun CNT fiber. It was measured with a heating rate of 10 °C/min under Ar.

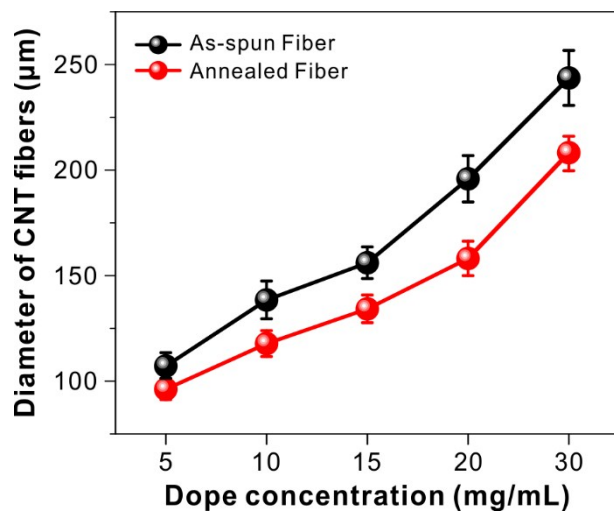

**Fig. S5** Diameters of the CNT fibers as a function of CNT concentration before and after thermal annealing.

**Table S1.** A comparison of the wet-spun CNT fiber to the CNT film on the TE performances.

The CNT fiber and film were prepared with the same CNT powder.

| Types of CNT                                                                      |                                | Electrical Conductivity (S/cm) | Seebeck Coefficient ( $\mu\text{V/K}$ ) | Power Factor ( $\mu\text{W/m}\cdot\text{K}^2$ ) |
|-----------------------------------------------------------------------------------|--------------------------------|--------------------------------|-----------------------------------------|-------------------------------------------------|
|  | <b>As-spun CNT Fiber (1D)</b>  | 2939                           | 18                                      | 92                                              |
|                                                                                   | <b>Annealed CNT Fiber (1D)</b> | 1353                           | 57                                      | 432                                             |
|  | <b>CNT Film (2D)</b>           | 497                            | 46                                      | 106                                             |

**Table S2.** A comparison of this work to recent works on TE performance of the wet-spun CNT fibers. Data points were extracted from the references.

| No. | Fiber Composition | Thermoelectric power factor ( $\mu\text{W}/\text{mK}^2$ ) |                      | Literature                                              |
|-----|-------------------|-----------------------------------------------------------|----------------------|---------------------------------------------------------|
|     |                   | <i>p</i> -type fiber                                      | <i>n</i> -type fiber |                                                         |
| 1   | PANI/MWCNT        | 0.17                                                      |                      | <i>J. Mater. Chem.</i> , <b>2012</b> , 22, 17612        |
| 2   | P3OT/carbon fiber | 7.05                                                      |                      | <i>Composites: Part B</i> <b>2015</b> , 69, 467         |
| 3   | Lignin/PAN fiber  | 9.27                                                      | 10.2                 | <i>Int. J. Biol. Macromol.</i> , <b>2019</b> , 121, 472 |
| 4   | PEG/SWCNT         | 82                                                        | 48.2                 | <i>J. Mater. Chem. A</i> <b>2017</b> , 5, 12068         |
| 5   | PEDOT:PSS/SWCNT   | 83.2                                                      | 113.2                | <i>Carbon</i> <b>2018</b> , 133, 293                    |
| 6   | PVDF/SWCNT        | 378                                                       | 289                  | <i>Nanoscale</i> <b>2018</b> , 10, 19766                |
| 7   | DWCNT             | 431.8                                                     | 322.6                | This work                                               |
